# Supplementary material for: A Long-Term Study on the Content of Polycyclic Aromatic Hydrocarbons in Rubber from End-of-Life Tires of Passenger Cars and Trucks
Source: MDPI journal article supplement (doi:10.3390/ma15197017), 2022-10-10
Supplement: s1 [file s1]

# A Long-Term Study on the Content of Polycyclic Aromatic Hydrocarbons in Rubber from End-of-life Tires of Passenger Cars and Trucks

Stefan Hoyer <sup>1,\*</sup>, Kirsten Lippert <sup>2</sup>, Albrecht Seidel <sup>2</sup> and Lothar Kroll <sup>1</sup>

<sup>1</sup> Technische Universität Chemnitz, Professur Strukturleichtbau und Kunststoffverarbeitung, Reichenhainer Straße 31/33, 09126 Chemnitz, Germany

<sup>2</sup> Biochemical Institute for Environmental Carcinogens Prof. Dr. Gernot Grimmer-Foundation, 22927 Grosshansdorf, Germany

\* Correspondence: stefan.hoyer@mb.tu-chemnitz.de (S.H.); Tel.: +49 371 531-37814

## Table of content

|                                                                                                                                                                                                                      |          |
|----------------------------------------------------------------------------------------------------------------------------------------------------------------------------------------------------------------------|----------|
| Table S1. Limit of quantification (LOQ, $\mu\text{g/kg}$ ) and limit of detection (LOD, $\mu\text{g/kg}$ ) values using a sample amount of 10.00 g, and coefficients of determination ( $R^2$ ) of the calibrations. | page 2   |
| Table S2. Overview of all individual measurement results for the PAH content of passenger car tires, whole tires (PW) in $\text{mg/kg}$ (part 1)                                                                     | page 3–4 |
| Table S3. Overview of all individual measurement results for the PAH content of truck tires, whole tires (TW) in $\text{mg/kg}$                                                                                      | page 5–6 |
| Table S4. Overview of all individual measurement results for the PAH content of truck tires, tread (TT) in $\text{mg/kg}$                                                                                            | page 7   |

**Table S1.** Limit of quantification (LOQ,  $\mu\text{g/kg}$ ) and limit of detection (LOD,  $\mu\text{g/kg}$ ) values using a sample amount of 10.00 g, and coefficients of determination ( $R^2$ ) of the calibrations.

| PAH                                               | LOQ     | LOD     | $R^2$ |
|---------------------------------------------------|---------|---------|-------|
| Naphthalene                                       | < 1.068 | < 0.356 | 0.999 |
| Acenaphthylene                                    | < 0.279 | < 0.093 | 0.999 |
| Acenaphthene                                      | < 0.137 | < 0.046 | 0.999 |
| Fluorene                                          | < 0.029 | < 0.010 | 0.999 |
| Phenanthrene                                      | < 0.016 | < 0.005 | 0.999 |
| Anthracene                                        | < 0.005 | < 0.002 | 0.995 |
| Fluoranthene                                      | < 0.009 | < 0.003 | 0.999 |
| Pyrene                                            | < 0.027 | < 0.009 | 0.999 |
| Benzo[ <i>b</i> ]naphtho[2,1- <i>d</i> ]thiophene | < 0.016 | < 0.005 | 0.994 |
| Benzo[ <i>ghi</i> ]fluoranthene                   | < 0.033 | < 0.011 | 0.998 |
| Benzo[ <i>c</i> ]phenanthrene                     | < 0.015 | < 0.005 | 0.999 |
| Benzo[ <i>a</i> ]anthracene                       | < 0.029 | < 0.010 | 0.999 |
| Cyclopenta[ <i>cd</i> ]pyrene                     | < 0.033 | < 0.011 | 0.975 |
| Triphenylene                                      | < 0.016 | < 0.005 | 0.999 |
| Chrysene                                          | < 0.016 | < 0.005 | 0.999 |
| Benzo[ <i>b</i> ]fluoranthene                     | < 0.006 | < 0.002 | 0.999 |
| Benzo[ <i>k</i> ]fluoranthene                     | < 0.006 | < 0.002 | 0.997 |
| Benzo[ <i>j</i> ]fluoranthene                     | < 0.006 | < 0.002 | 0.997 |
| Benzo[ <i>e</i> ]pyrene                           | < 0.024 | < 0.008 | 0.996 |
| Benzo[ <i>a</i> ]pyrene                           | < 0.042 | < 0.014 | 0.999 |
| Perylene                                          | < 0.024 | < 0.008 | 0.990 |
| Indeno[1,2,3- <i>cd</i> ]pyrene                   | < 0.027 | < 0.009 | 0.990 |
| Dibenzo[ <i>a,h</i> ]anthracene                   | < 0.011 | < 0.004 | 0.995 |
| Benzo[ <i>ghi</i> ]perylene                       | < 0.019 | < 0.006 | 0.999 |
| Anthanthrene                                      | < 0.019 | < 0.006 | 0.960 |
| Coronene                                          | < 0.019 | < 0.006 | 0.999 |

**Table S2.** Overview of all individual measurement results for the PAH content of passenger car tires, whole tires (PW) in mg/kg (part 1)

| Date                            | 07.17  |        | 08.17  |        |        |        | 09.17  |        |        | 10.17  |        | 11.17  |        | 12.17  |        | 01.18  |        | 02.18  |        | 03.18  |        |
|---------------------------------|--------|--------|--------|--------|--------|--------|--------|--------|--------|--------|--------|--------|--------|--------|--------|--------|--------|--------|--------|--------|--------|
| Sample number                   | 1      | 2      | 3      | 4      | 5      | 6      | 7      | 8      | 9      | 10     | 11/12  | 13 (A) | 13 (B) | 14 (A) | 14 (B) | 15 (A) | 15 (B) | 16 (A) | 16 (B) | 17 (A) | 17 (B) |
| PAH species                     | mg/kg  |
| Naphthalene                     | 1.578  | 1.531  | 1.375  | 1.652  | 1.707  | 1.477  | 2.181  | 2.494  | 1.676  | 1.527  | 1.500  | 1.471  | 1.401  | 2.080  | 2.540  | 3.388  | 3.200  | 1.448  | 1.531  | 1.388  | 1.342  |
| Acenaphthylene                  | 0.937  | 0.994  | 1.017  | 1.022  | 0.990  | 1.084  | 1.050  | 1.190  | 0.857  | 1.042  | 1.245  | 1.190  | 1.077  | 1.121  | 1.101  | 1.107  | 1.002  | 1.349  | 1.335  | 1.248  | 1.291  |
| Acenaphthene                    | 0.082  | 0.162  | 0.868  | 0.158  | 0.085  | 0.139  | 0.074  | 0.071  | 0.072  | 0.125  | 0.546  | 0.104  | 0.097  | 0.077  | 0.070  | 0.081  | 0.079  | 0.140  | 0.130  | 0.132  | 0.124  |
| Fluorene                        | 0.247  | 0.320  | 0.794  | 0.269  | 0.318  | 0.252  | 0.256  | 0.252  | 0.243  | 0.287  | 0.457  | 0.245  | 0.239  | 0.248  | 0.260  | 0.249  | 0.258  | 0.384  | 0.348  | 0.309  | 0.290  |
| Phenanthrene                    | 3.855  | 4.030  | 6.289  | 3.849  | 4.295  | 3.750  | 3.691  | 3.723  | 3.882  | 4.004  | 4.851  | 3.851  | 3.734  | 4.032  | 3.954  | 3.700  | 3.729  | 4.901  | 4.875  | 4.312  | 4.394  |
| Anthracene                      | 0.251  | 0.254  | 0.339  | 0.279  | 0.368  | 0.322  | 0.265  | 0.248  | 0.295  | 0.323  | 0.302  | 0.230  | 0.246  | 0.260  | 0.283  | 0.273  | 0.270  | 0.390  | 0.365  | 0.321  | 0.321  |
| Fluoranthene                    | 7.714  | 7.876  | 9.042  | 7.702  | 8.322  | 7.522  | 7.656  | 8.249  | 8.280  | 8.148  | 8.744  | 7.946  | 7.806  | 8.450  | 8.204  | 7.753  | 7.824  | 9.694  | 9.706  | 8.503  | 8.746  |
| Pyrene                          | 30.162 | 30.336 | 30.885 | 29.842 | 29.413 | 29.255 | 29.845 | 31.474 | 30.446 | 29.414 | 32.429 | 31.504 | 31.091 | 32.206 | 31.356 | 30.357 | 30.869 | 33.606 | 34.102 | 31.349 | 32.370 |
| Benzo[b]naphtho[2,1-d]thiophene | 0.983  | 1.089  | 1.050  | 1.013  | 0.923  | 1.113  | 1.068  | 0.980  | 1.470  | 1.148  | 0.869  | 0.907  | 0.888  | 1.450  | 1.525  | 0.984  | 0.954  | 1.400  | 1.283  | 1.168  | 1.141  |
| Benzo[ghi]fluoranthene          | 3.557  | 3.555  | 3.593  | 3.509  | 3.461  | 3.521  | 3.347  | 3.557  | 3.598  | 3.345  | 3.474  | 3.333  | 3.357  | 3.767  | 3.762  | 3.461  | 3.556  | 3.651  | 3.443  | 3.350  | 3.411  |
| Benzo[c]phenanthrene            | 0.182  | 0.179  | 0.205  | 0.196  | 0.220  | 0.163  | 0.204  | 0.215  | 0.235  | 0.210  | 0.200  | 0.177  | 0.180  | 0.222  | 0.238  | 0.210  | 0.209  | 0.291  | 0.258  | 0.246  | 0.225  |
| Benzo[a]anthracene              | 0.409  | 0.491  | 0.415  | 0.471  | 0.707  | 0.487  | 0.456  | 0.467  | 0.619  | 0.566  | 0.433  | 0.345  | 0.334  | 0.444  | 0.505  | 0.475  | 0.457  | 0.702  | 0.681  | 0.545  | 0.605  |
| Cyclopenta[cd]pyrene            | 4.564  | 4.258  | 3.946  | 4.403  | 4.738  | 5.425  | 4.293  | 4.853  | 4.400  | 4.124  | 4.723  | 4.525  | 4.439  | 5.136  | 5.105  | 4.910  | 4.979  | 5.311  | 4.677  | 5.159  | 5.066  |
| Triphenylene                    | 1.047  | 1.200  | 1.069  | 1.071  | 0.905  | 1.142  | 1.144  | 1.063  | 1.536  | 1.038  | 0.829  | 0.916  | 0.851  | 1.399  | 1.521  | 0.961  | 0.905  | 1.381  | 1.250  | 1.133  | 1.177  |
| Chrysene                        | 0.928  | 1.093  | 0.963  | 1.010  | 1.061  | 1.055  | 1.032  | 1.117  | 1.374  | 1.103  | 0.860  | 0.807  | 0.766  | 1.149  | 1.219  | 0.971  | 0.928  | 1.343  | 1.334  | 1.105  | 1.185  |
| Benzo[b]fluoranthene            | 0.870  | 0.913  | 0.817  | 0.884  | 1.043  | 0.972  | 0.868  | 0.956  | 1.142  | 0.952  | 0.778  | 0.777  | 0.745  | 1.087  | 1.114  | 0.886  | 0.856  | 1.213  | 1.159  | 0.957  | 1.054  |
| Benzo[k]fluoranthene            | 0.271  | 0.282  | 0.233  | 0.280  | 0.344  | 0.271  | 0.232  | 0.303  | 0.370  | 0.332  | 0.242  | 0.239  | 0.245  | 0.328  | 0.389  | 0.267  | 0.296  | 0.368  | 0.366  | 0.323  | 0.337  |
| Benzo[j]fluoranthene            | 0.206  | 0.257  | 0.215  | 0.253  | 0.353  | 0.275  | 0.264  | 0.299  | 0.284  | 0.284  | 0.251  | 0.222  | 0.213  | 0.304  | 0.291  | 0.303  | 0.283  | 0.404  | 0.394  | 0.287  | 0.325  |
| Benzo[e]pyrene                  | 3.148  | 3.248  | 2.992  | 3.078  | 2.967  | 3.356  | 2.891  | 2.949  | 3.605  | 2.914  | 2.613  | 2.752  | 2.676  | 3.654  | 3.735  | 3.024  | 2.983  | 3.606  | 3.484  | 3.206  | 3.332  |
| Benzo[a]pyrene                  | 1.808  | 1.831  | 1.708  | 1.788  | 1.968  | 1.901  | 1.686  | 1.819  | 1.886  | 1.784  | 1.676  | 1.642  | 1.609  | 1.895  | 1.889  | 1.851  | 1.821  | 2.088  | 2.058  | 1.901  | 2.031  |
| Perylene                        | 0.432  | 0.433  | 0.381  | 0.407  | 0.480  | 0.515  | 0.399  | 0.405  | 0.517  | 0.419  | 0.357  | 0.360  | 0.349  | 0.490  | 0.533  | 0.439  | 0.430  | 0.526  | 0.495  | 0.464  | 0.496  |
| Indeno[1,2,3-cd]pyrene          | 2.280  | 2.209  | 2.157  | 2.252  | 2.387  | 2.464  | 1.982  | 2.213  | 2.202  | 2.100  | 2.117  | 2.150  | 2.097  | 2.440  | 2.403  | 2.372  | 2.327  | 2.691  | 2.653  | 2.452  | 2.623  |
| Dibenzo[a,h]anthracene          | 0.066  | 0.069  | 0.047  | 0.060  | 0.078  | 0.095  | 0.065  | 0.074  | 0.061  | 0.043  | 0.061  | 0.054  | 0.042  | 0.048  | 0.071  | 0.050  | 0.055  | 0.119  | 0.125  | 0.091  | 0.086  |
| Benzo[ghi]perylene              | 14.072 | 13.681 | 13.632 | 13.397 | 12.866 | 13.461 | 12.749 | 13.497 | 13.497 | 12.876 | 12.636 | 12.980 | 12.741 | 14.119 | 13.678 | 12.850 | 13.216 | 14.212 | 14.312 | 13.698 | 14.045 |
| Anthanthrene                    | 4.407  | 3.980  | 3.812  | 4.123  | 4.420  | 4.765  | 3.805  | 4.152  | 4.175  | 4.020  | 3.972  | 4.050  | 4.065  | 4.880  | 4.618  | 4.384  | 4.680  | 4.521  | 4.065  | 4.249  | 4.298  |
| Coronene                        | 12.552 | 10.730 | 11.539 | 11.788 | 10.727 | 12.187 | 10.620 | 11.349 | 11.257 | 11.100 | 11.262 | 11.766 | 12.004 | 12.818 | 12.388 | 12.365 | 12.341 | 11.650 | 11.088 | 11.233 | 11.401 |

**Table S2.** Overview of all individual measurement results for the PAH content of passenger car tires, whole tires (PW) in mg/kg (part 2)

| Date                            | 04.18  |        | 05.18  |        | 06.18  |        | 07.18  |        | 08.18  | 09.18  | 10.18  | 11.18  | 12.18  | 01.19  | 02.19  | 03.19  | 04.19  | 05.19  | 06.19  | 07.19  |
|---------------------------------|--------|--------|--------|--------|--------|--------|--------|--------|--------|--------|--------|--------|--------|--------|--------|--------|--------|--------|--------|--------|
| Sample number                   | 18 (A) | 18 (B) | 19 (A) | 19 (B) | 20 (A) | 20 (B) | 21 (A) | 21 (B) | 22     | 23     | 24     | 25     | 26     | 27     | 28     | 29     | 30     | 31     | 32     | 33     |
| PAH species                     | mg/kg  |
| Naphthalene                     | 1.213  | 1.238  | 1.391  | 1.194  | 1.562  | 1.505  | 1.568  | 1.504  | 1.153  | 1.261  | 1.211  | 1.883  | 2.129  | 1.804  | 1.134  | 1.156  | 1.260  | 1.067  | 1.097  | 1.473  |
| Acenaphthylene                  | 1.171  | 1.199  | 1.334  | 1.135  | 1.212  | 1.119  | 1.185  | 1.263  | 1.037  | 1.219  | 1.257  | 1.301  | 1.281  | 1.193  | 1.100  | 1.103  | 1.182  | 1.076  | 1.067  | 1.274  |
| Acenaphthene                    | 0.100  | 0.106  | 0.130  | 0.117  | 0.100  | 0.107  | 0.124  | 0.135  | 0.053  | 0.065  | 0.081  | 0.096  | 0.082  | 0.099  | 0.089  | 0.070  | 0.086  | 0.064  | 0.063  | 0.064  |
| Fluorene                        | 0.269  | 0.299  | 0.337  | 0.311  | 0.282  | 0.268  | 0.336  | 0.331  | 0.234  | 0.235  | 0.196  | 0.455  | 0.401  | 0.400  | 0.197  | 0.176  | 0.231  | 0.168  | 0.235  | 0.172  |
| Phenanthrene                    | 3.965  | 3.984  | 4.415  | 4.137  | 4.049  | 3.865  | 4.118  | 4.304  | 3.792  | 3.981  | 3.948  | 5.685  | 5.235  | 5.003  | 4.077  | 3.463  | 4.444  | 3.443  | 4.134  | 3.932  |
| Anthracene                      | 0.296  | 0.273  | 0.325  | 0.310  | 0.296  | 0.292  | 0.323  | 0.325  | 0.236  | 0.240  | 0.215  | 0.536  | 0.432  | 0.409  | 0.328  | 0.221  | 0.361  | 0.240  | 0.353  | 0.357  |
| Fluoranthene                    | 8.249  | 8.323  | 8.902  | 8.579  | 8.770  | 8.389  | 8.732  | 8.937  | 8.482  | 7.964  | 7.751  | 9.936  | 9.080  | 8.677  | 7.486  | 6.770  | 8.089  | 6.848  | 7.484  | 7.488  |
| Pyrene                          | 31.434 | 31.903 | 32.663 | 31.529 | 32.894 | 31.687 | 32.087 | 33.005 | 31.662 | 30.552 | 29.978 | 33.512 | 32.828 | 31.454 | 24.020 | 23.792 | 25.299 | 23.443 | 24.605 | 25.394 |
| Benzo[b]naphtho[2,1-d]thiophene | 1.141  | 1.183  | 0.942  | 0.952  | 1.338  | 1.306  | 1.111  | 1.043  | 0.754  | 0.548  | 0.510  | 0.783  | 0.622  | 0.623  | 0.911  | 0.625  | 1.060  | 0.586  | 0.610  | 0.661  |
| Benzo[ghi]fluoranthene          | 3.489  | 3.549  | 3.482  | 3.364  | 3.746  | 3.570  | 3.462  | 3.449  | 3.021  | 2.914  | 2.793  | 3.203  | 3.201  | 2.932  | 2.926  | 2.813  | 3.079  | 2.723  | 2.815  | 2.990  |
| Benzo[c]phenanthrene            | 0.209  | 0.213  | 0.226  | 0.232  | 0.256  | 0.239  | 0.268  | 0.247  | 0.184  | 0.146  | 0.161  | 0.229  | 0.185  | 0.185  | 0.216  | 0.174  | 0.228  | 0.164  | 0.183  | 0.138  |
| Benzo[a]anthracene              | 0.452  | 0.432  | 0.538  | 0.575  | 0.480  | 0.504  | 0.669  | 0.545  | 0.495  | 0.334  | 0.311  | 1.176  | 0.492  | 0.608  | 0.576  | 0.407  | 0.737  | 0.317  | 0.362  | 0.466  |
| Cyclopenta[cd]pyrene            | 4.951  | 4.743  | 5.212  | 4.959  | 5.516  | 5.132  | 5.140  | 5.315  | 3.824  | 3.688  | 3.380  | 4.490  | 4.775  | 4.636  | 3.286  | 3.468  | 4.285  | 3.432  | 3.451  | 5.337  |
| Triphenylene                    | 1.112  | 1.192  | 0.893  | 0.920  | 1.152  | 1.128  | 1.139  | 1.014  | 0.901  | 0.563  | 0.646  | 1.027  | 0.806  | 0.810  | 0.985  | 0.733  | 1.111  | 0.744  | 0.590  | 0.735  |
| Chrysene                        | 0.976  | 0.997  | 0.932  | 0.986  | 1.032  | 1.022  | 1.200  | 1.003  | 0.927  | 0.600  | 0.635  | 1.493  | 0.904  | 0.948  | 1.083  | 0.803  | 1.316  | 0.743  | 0.686  | 0.840  |
| Benzo[b]fluoranthene            | 0.910  | 0.935  | 0.938  | 0.988  | 0.978  | 0.967  | 1.010  | 0.909  | 0.879  | 0.661  | 0.629  | 1.441  | 0.832  | 0.926  | 0.931  | 0.704  | 1.059  | 0.662  | 0.648  | 0.816  |
| Benzo[k]fluoranthene            | 0.276  | 0.276  | 0.309  | 0.337  | 0.310  | 0.284  | 0.346  | 0.284  | 0.254  | 0.198  | 0.134  | 0.459  | 0.221  | 0.244  | 0.311  | 0.232  | 0.361  | 0.196  | 0.201  | 0.285  |
| Benzo[j]fluoranthene            | 0.270  | 0.243  | 0.323  | 0.312  | 0.284  | 0.298  | 0.314  | 0.308  | 0.274  | 0.181  | 0.206  | 0.564  | 0.268  | 0.303  | 0.340  | 0.231  | 0.366  | 0.201  | 0.201  | 0.271  |
| Benzo[e]pyrene                  | 3.202  | 3.262  | 2.994  | 3.052  | 3.307  | 3.273  | 3.251  | 2.981  | 2.684  | 2.256  | 2.241  | 3.301  | 2.631  | 2.619  | 2.556  | 2.248  | 2.760  | 2.148  | 2.032  | 2.358  |
| Benzo[a]pyrene                  | 1.849  | 1.838  | 1.859  | 1.937  | 1.927  | 1.873  | 1.993  | 1.917  | 1.719  | 1.521  | 1.458  | 2.503  | 1.785  | 1.811  | 1.706  | 1.523  | 1.895  | 1.458  | 1.450  | 1.835  |
| Perylene                        | 0.450  | 0.454  | 0.445  | 0.433  | 0.468  | 0.444  | 0.477  | 0.447  | 0.355  | 0.298  | 0.249  | 0.549  | 0.362  | 0.403  | 0.386  | 0.304  | 0.477  | 0.286  | 0.279  | 0.406  |
| Indeno[1,2,3-cd]pyrene          | 2.458  | 2.455  | 2.482  | 2.459  | 2.584  | 2.477  | 2.504  | 2.410  | 2.148  | 2.104  | 1.749  | 2.672  | 2.201  | 2.133  | 2.239  | 2.004  | 2.412  | 1.936  | 1.940  | 2.413  |
| Dibenzo[a,h]anthracene          | 0.048  | 0.043  | 0.047  | 0.050  | 0.044  | 0.051  | 0.052  | 0.046  | 0.076  | 0.039  | 0.039  | 0.162  | 0.061  | 0.075  | 0.092  | 0.074  | 0.111  | 0.065  | 0.061  | 0.030  |
| Benzo[ghi]perylene              | 13.661 | 13.913 | 13.568 | 13.220 | 13.981 | 13.558 | 13.544 | 13.076 | 12.698 | 12.120 | 12.614 | 13.793 | 13.364 | 12.715 | 10.874 | 10.265 | 11.367 | 9.776  | 10.206 | 10.504 |
| Anthanthrene                    | 4.403  | 4.314  | 4.328  | 4.248  | 4.741  | 4.446  | 4.345  | 4.404  | 3.401  | 2.961  | 2.325  | 3.774  | 3.441  | 3.421  | 2.655  | 2.566  | 3.099  | 2.414  | 2.456  | 3.727  |
| Coronene                        | 11.327 | 11.319 | 10.756 | 10.695 | 11.561 | 11.407 | 11.158 | 11.094 | 11.317 | 9.549  | 8.880  | 12.197 | 11.529 | 9.851  | 10.893 | 10.169 | 10.787 | 9.430  | 9.999  | 12.140 |

**Table S3.** Overview of all individual measurement results for the PAH content of truck tires, whole tires (TW) in mg/kg (part 1)

| Date                            | 08.17   |         | 09.17   |         | 10.17   |         | 11.17  |        | 12.17   |         | 01.18   |         | 02.18    |         | 03.18   |         | 04.18    |          |
|---------------------------------|---------|---------|---------|---------|---------|---------|--------|--------|---------|---------|---------|---------|----------|---------|---------|---------|----------|----------|
| Sample number                   | 1.1 (A) | 1.1 (B) | 1.2 (A) | 1.2 (B) | 1.3 (A) | 1.3 (B) | 1.4    | 1.5    | 1.6 (A) | 1.6 (B) | 1.8 (A) | 1.8 (B) | 1.8 ( C) | 1.8 (D) | 1.9 (A) | 1.9 (B) | 1.10 (A) | 1.10 (B) |
| PAH species                     | mg/kg   | mg/kg   | mg/kg   | mg/kg   | mg/kg   | mg/kg   | mg/kg  | mg/kg  | mg/kg   | mg/kg   | mg/kg   | mg/kg   | mg/kg    | mg/kg   | mg/kg   | mg/kg   | mg/kg    | mg/kg    |
| Naphthalene                     | 2.073   | 2.123   | 1.906   | 2.067   | 2.496   | 2.419   | 2.517  | 2.517  | 2.571   | 2.085   | 2.568   | 2.958   | 2.655    | 2.060   | 2.214   | 2.440   | 2.494    | 3.642    |
| Acenaphthylene                  | 2.168   | 2.188   | 1.480   | 1.818   | 2.296   | 2.276   | 2.245  | 2.160  | 2.410   | 2.137   | 2.688   | 2.692   | 2.544    | 2.347   | 2.248   | 2.509   | 2.364    | 2.559    |
| Acenaphthene                    | 0.208   | 0.206   | 0.117   | 0.126   | 0.155   | 0.161   | 0.162  | 0.210  | 0.182   | 0.170   | 0.236   | 0.463   | 0.196    | 0.317   | 0.251   | 0.245   | 0.284    | 0.300    |
| Fluorene                        | 0.377   | 0.383   | 0.274   | 0.307   | 0.317   | 0.323   | 0.328  | 0.439  | 0.381   | 0.354   | 0.374   | 0.716   | 0.360    | 0.546   | 0.435   | 0.425   | 0.528    | 0.512    |
| Phenanthrene                    | 5.851   | 5.941   | 4.042   | 4.900   | 5.263   | 5.017   | 5.352  | 6.286  | 5.795   | 5.476   | 5.878   | 5.650   | 5.545    | 5.247   | 5.321   | 5.608   | 5.262    | 5.579    |
| Anthracene                      | 0.492   | 0.560   | 0.291   | 0.350   | 0.351   | 0.344   | 0.385  | 0.464  | 0.438   | 0.444   | 0.456   | 0.461   | 0.397    | 0.403   | 0.378   | 0.400   | 0.400    | 0.462    |
| Fluoranthene                    | 9.665   | 9.550   | 7.821   | 8.766   | 9.298   | 9.066   | 9.401  | 9.619  | 9.586   | 9.003   | 10.172  | 9.589   | 9.731    | 9.241   | 9.338   | 9.638   | 9.314    | 9.612    |
| Pyrene                          | 35.390  | 34.484  | 30.103  | 33.494  | 34.960  | 34.849  | 34.960 | 35.796 | 35.774  | 33.669  | 36.103  | 34.166  | 35.267   | 33.513  | 33.494  | 34.478  | 33.765   | 34.235   |
| Benzo[b]naphtho[2,1-d]thiophene | 0.233   | 0.278   | 0.259   | 0.275   | 0.260   | 0.248   | 0.264  | 0.203  | 0.256   | 0.247   | 0.242   | 0.249   | 0.301    | 0.267   | 0.243   | 0.247   | 0.271    | 0.268    |
| Benzo[ghi]fluoranthene          | 3.497   | 3.637   | 3.251   | 3.462   | 3.462   | 3.506   | 3.292  | 3.350  | 3.563   | 3.391   | 3.514   | 3.322   | 3.558    | 3.313   | 3.255   | 3.359   | 3.322    | 3.478    |
| Benzo[c]phenanthrene            | 0.186   | 0.208   | 0.169   | 0.179   | 0.167   | 0.170   | 0.170  | 0.208  | 0.190   | 0.184   | 0.190   | 0.180   | 0.189    | 0.187   | 0.180   | 0.184   | 0.184    | 0.188    |
| Benzo[a]anthracene              | 0.321   | 0.391   | 0.307   | 0.419   | 0.368   | 0.354   | 0.351  | 0.429  | 0.414   | 0.433   | 0.347   | 0.360   | 0.344    | 0.392   | 0.320   | 0.342   | 0.332    | 0.356    |
| Cyclopenta[cd]pyrene            | 4.329   | 4.872   | 3.335   | 3.873   | 4.204   | 4.252   | 4.001  | 3.455  | 4.418   | 3.967   | 5.045   | 4.600   | 4.946    | 3.989   | 4.430   | 5.026   | 4.710    | 5.218    |
| Triphenylene                    | 0.341   | 0.377   | 0.362   | 0.411   | 0.415   | 0.377   | 0.402  | 0.306  | 0.368   | 0.379   | 0.380   | 0.397   | 0.431    | 0.449   | 0.393   | 0.410   | 0.386    | 0.345    |
| Chrysene                        | 0.502   | 0.583   | 0.484   | 0.617   | 0.588   | 0.534   | 0.568  | 0.574  | 0.604   | 0.617   | 0.515   | 0.543   | 0.541    | 0.600   | 0.505   | 0.530   | 0.517    | 0.508    |
| Benzo[b]fluoranthene            | 0.492   | 0.636   | 0.473   | 0.521   | 0.554   | 0.503   | 0.536  | 0.490  | 0.552   | 0.550   | 0.578   | 0.555   | 0.567    | 0.590   | 0.537   | 0.552   | 0.559    | 0.561    |
| Benzo[k]fluoranthene            | 0.148   | 0.196   | 0.125   | 0.162   | 0.146   | 0.153   | 0.163  | 0.120  | 0.153   | 0.152   | 0.180   | 0.160   | 0.169    | 0.161   | 0.149   | 0.166   | 0.185    | 0.190    |
| Benzo[j]fluoranthene            | 0.157   | 0.211   | 0.145   | 0.157   | 0.167   | 0.155   | 0.158  | 0.142  | 0.173   | 0.170   | 0.194   | 0.186   | 0.185    | 0.189   | 0.170   | 0.178   | 0.195    | 0.193    |
| Benzo[e]pyrene                  | 2.011   | 2.362   | 1.995   | 2.142   | 2.192   | 2.080   | 2.116  | 1.948  | 2.140   | 2.163   | 2.301   | 2.277   | 2.378    | 2.387   | 2.181   | 2.278   | 2.237    | 2.213    |
| Benzo[a]pyrene                  | 1.617   | 1.906   | 1.536   | 1.703   | 1.768   | 1.697   | 1.649  | 1.724  | 1.725   | 1.755   | 1.871   | 1.858   | 1.810    | 1.882   | 1.756   | 1.848   | 1.768    | 1.763    |
| Perylene                        | 0.222   | 0.329   | 0.222   | 0.265   | 0.264   | 0.251   | 0.240  | 0.204  | 0.269   | 0.268   | 0.294   | 0.286   | 0.302    | 0.301   | 0.256   | 0.292   | 0.303    | 0.310    |
| Indeno[1,2,3-cd]pyrene          | 1.860   | 2.204   | 1.787   | 1.767   | 1.899   | 1.827   | 1.736  | 1.642  | 1.957   | 1.897   | 2.317   | 2.058   | 2.150    | 1.993   | 2.006   | 2.142   | 2.035    | 2.044    |
| Dibenzo[a,h]anthracene          | 0.016   | 0.027   | 0.021   | 0.027   | 0.022   | 0.023   | 0.025  | 0.019  | 0.029   | 0.032   | 0.029   | 0.023   | 0.024    | 0.029   | 0.020   | 0.027   | 0.023    | 0.026    |
| Benzo[ghi]perylene              | 11.823  | 12.248  | 11.555  | 11.270  | 12.456  | 11.743  | 11.477 | 11.874 | 11.830  | 11.861  | 12.695  | 12.419  | 12.731   | 12.243  | 11.960  | 12.329  | 11.506   | 11.365   |
| Anthanthrene                    | 3.266   | 4.271   | 2.994   | 3.184   | 3.341   | 3.270   | 3.060  | 2.765  | 3.386   | 3.427   | 3.514   | 3.468   | 3.594    | 3.173   | 3.278   | 3.567   | 3.519    | 3.712    |
| Coronene                        | 10.666  | 10.478  | 10.399  | 9.994   | 11.247  | 10.625  | 10.180 | 10.318 | 10.819  | 10.823  | 9.424   | 9.453   | 9.795    | 9.121   | 9.274   | 9.604   | 8.813    | 8.811    |

**Table S3.** Overview of all individual measurement results for the PAH content of truck tires, whole tires (TW) in mg/kg (part 2)

| Date                            | 05.18    |          | 06.18    |          | 07.18    |          | 08.18  | 09.18  | 10.18  | 11.18  | 12.18  | 01.19  | 02.19  | 03.19  | 04.19  | 05.19  | 06.19  | 07.19  |
|---------------------------------|----------|----------|----------|----------|----------|----------|--------|--------|--------|--------|--------|--------|--------|--------|--------|--------|--------|--------|
| Sample number                   | 1.11 (A) | 1.11 (B) | 1.12 (A) | 1.12 (B) | 1.13 (A) | 1.13 (B) | 1.14   | 1.15   | 1.16   | 1.17   | 1.18   | 1.19   | 1.20   | 1.21   | 1.22   | 1.23   | 1.24   | 1.25   |
| PAH species                     | mg/kg    | mg/kg    | mg/kg    | mg/kg    | mg/kg    | mg/kg    | mg/kg  | mg/kg  | mg/kg  | mg/kg  | mg/kg  | mg/kg  | mg/kg  | mg/kg  | mg/kg  | mg/kg  | mg/kg  | mg/kg  |
| Naphthalene                     | 2.763    | 2.622    | 2.121    | 2.207    | 2.606    | 2.547    | 2.025  | 2.272  | 2.253  | 2.207  | 2.341  | 2.270  | 1.805  | 1.917  | 2.166  | 2.152  | 2.711  | 2.210  |
| Acenaphthylene                  | 2.753    | 2.818    | 2.359    | 2.495    | 2.499    | 2.723    | 2.091  | 2.249  | 2.215  | 2.265  | 2.303  | 2.185  | 2.116  | 2.086  | 2.352  | 2.487  | 2.731  | 2.401  |
| Acenaphthene                    | 0.283    | 0.373    | 0.250    | 0.300    | 0.300    | 0.262    | 0.142  | 0.162  | 0.145  | 0.147  | 0.104  | 0.107  | 0.188  | 0.156  | 0.174  | 0.153  | 0.193  | 0.160  |
| Fluorene                        | 0.480    | 0.671    | 0.462    | 0.598    | 0.568    | 0.475    | 0.310  | 0.317  | 0.307  | 0.334  | 0.319  | 0.284  | 0.259  | 0.239  | 0.259  | 0.251  | 0.302  | 0.257  |
| Phenanthrene                    | 5.693    | 5.687    | 5.381    | 5.601    | 5.510    | 5.826    | 5.163  | 5.248  | 5.003  | 5.574  | 5.151  | 4.695  | 4.958  | 4.858  | 4.843  | 4.863  | 5.476  | 4.778  |
| Anthracene                      | 0.444    | 0.469    | 0.383    | 0.443    | 0.466    | 0.456    | 0.313  | 0.304  | 0.285  | 0.357  | 0.316  | 0.258  | 0.378  | 0.347  | 0.345  | 0.344  | 0.407  | 0.371  |
| Fluoranthene                    | 9.919    | 9.636    | 9.373    | 9.567    | 9.483    | 9.983    | 9.181  | 9.321  | 9.138  | 9.735  | 9.257  | 8.693  | 8.084  | 8.025  | 8.353  | 8.118  | 8.374  | 7.866  |
| Pyrene                          | 35.112   | 34.324   | 33.729   | 33.910   | 33.912   | 35.322   | 33.629 | 34.032 | 33.264 | 35.111 | 34.149 | 32.250 | 25.443 | 25.750 | 26.760 | 25.849 | 27.152 | 25.501 |
| Benzo[b]naphtho[2,1-d]thiophene | 0.244    | 0.243    | 0.240    | 0.249    | 0.231    | 0.254    | 0.187  | 0.165  | 0.170  | 0.172  | 0.164  | 0.187  | 0.167  | 0.174  | 0.191  | 0.173  | 0.254  | 0.170  |
| Benzo[ghi]fluoranthene          | 3.463    | 3.225    | 3.249    | 3.351    | 3.310    | 3.414    | 2.928  | 2.915  | 2.947  | 3.133  | 2.928  | 2.813  | 2.694  | 2.808  | 2.870  | 2.976  | 2.961  | 2.870  |
| Benzo[c]phenanthrene            | 0.195    | 0.185    | 0.184    | 0.205    | 0.186    | 0.185    | 0.151  | 0.148  | 0.151  | 0.158  | 0.145  | 0.145  | 0.145  | 0.146  | 0.144  | 0.150  | 0.171  | 0.162  |
| Benzo[a]anthracene              | 0.443    | 0.448    | 0.348    | 0.409    | 0.406    | 0.413    | 0.303  | 0.281  | 0.292  | 0.348  | 0.356  | 0.326  | 0.317  | 0.312  | 0.283  | 0.283  | 0.343  | 0.308  |
| Cyclopenta[cd]pyrene            | 5.171    | 4.686    | 4.224    | 4.442    | 4.712    | 5.092    | 3.614  | 3.838  | 3.867  | 4.465  | 3.727  | 3.681  | 3.051  | 3.025  | 3.176  | 3.690  | 3.615  | 3.138  |
| Triphenylene                    | 0.387    | 0.408    | 0.415    | 0.430    | 0.366    | 0.421    | 0.388  | 0.328  | 0.341  | 0.329  | 0.354  | 0.309  | 0.301  | 0.368  | 0.349  | 0.303  | 0.460  | 0.311  |
| Chrysene                        | 0.610    | 0.631    | 0.543    | 0.602    | 0.560    | 0.622    | 0.496  | 0.455  | 0.471  | 0.516  | 0.540  | 0.517  | 0.516  | 0.519  | 0.496  | 0.471  | 0.642  | 0.497  |
| Benzo[b]fluoranthene            | 0.691    | 0.647    | 0.567    | 0.653    | 0.577    | 0.632    | 0.516  | 0.488  | 0.481  | 0.512  | 0.525  | 0.446  | 0.489  | 0.510  | 0.507  | 0.514  | 0.491  | 0.481  |
| Benzo[k]fluoranthene            | 0.217    | 0.195    | 0.157    | 0.179    | 0.183    | 0.187    | 0.111  | 0.101  | 0.102  | 0.114  | 0.127  | 0.104  | 0.152  | 0.142  | 0.129  | 0.142  | 0.118  | 0.137  |
| Benzo[j]fluoranthene            | 0.231    | 0.212    | 0.184    | 0.214    | 0.192    | 0.201    | 0.173  | 0.151  | 0.156  | 0.176  | 0.142  | 0.129  | 0.144  | 0.148  | 0.160  | 0.161  | 0.144  | 0.160  |
| Benzo[e]pyrene                  | 2.425    | 2.295    | 2.205    | 2.360    | 2.230    | 2.346    | 1.996  | 1.901  | 1.907  | 1.943  | 1.939  | 1.794  | 1.808  | 1.884  | 1.797  | 1.841  | 1.787  | 1.763  |
| Benzo[a]pyrene                  | 2.041    | 1.918    | 1.781    | 1.817    | 1.871    | 1.916    | 1.643  | 1.630  | 1.604  | 1.708  | 1.697  | 1.603  | 1.539  | 1.487  | 1.486  | 1.585  | 1.457  | 1.531  |
| Perylene                        | 0.363    | 0.305    | 0.250    | 0.290    | 0.278    | 0.298    | 0.214  | 0.193  | 0.202  | 0.217  | 0.219  | 0.186  | 0.235  | 0.223  | 0.212  | 0.243  | 0.231  | 0.206  |
| Indeno[1,2,3-cd]pyrene          | 2.266    | 2.055    | 1.952    | 2.087    | 2.042    | 2.091    | 1.799  | 1.709  | 1.729  | 1.806  | 1.663  | 1.546  | 1.766  | 1.783  | 1.775  | 1.936  | 1.592  | 1.601  |
| Dibenzo[a,h]anthracene          | 0.047    | 0.040    | 0.023    | 0.037    | 0.028    | 0.033    | 0.018  | 0.018  | 0.017  | 0.019  | 0.030  | 0.018  | 0.039  | 0.040  | 0.031  | 0.023  | 0.029  | 0.029  |
| Benzo[ghi]perylene              | 12.456   | 11.873   | 12.317   | 12.242   | 12.065   | 12.359   | 12.084 | 12.039 | 11.767 | 12.033 | 11.781 | 11.131 | 9.176  | 9.546  | 9.521  | 10.299 | 9.419  | 9.294  |
| Anthanthrene                    | 3.835    | 3.294    | 3.048    | 3.182    | 3.379    | 3.464    | 2.483  | 2.438  | 2.573  | 2.887  | 2.419  | 2.273  | 1.823  | 1.815  | 1.772  | 2.428  | 1.888  | 1.790  |
| Coronene                        | 9.303    | 9.329    | 9.396    | 9.312    | 9.587    | 9.666    | 9.445  | 9.060  | 8.864  | 9.509  | 10.157 | 9.881  | 8.536  | 9.217  | 9.055  | 8.854  | 8.364  | 8.181  |

**Table S4.** Overview of all individual measurement results for the PAH content of truck tires, tread (TT) in mg/kg

| Date                                     | 07.18         | 08.18    | 09.18  | 10.18  | 11.18  | 12.18  | 01.19  | 02.19  | 03.19  | 04.19  | 05.19  | 06.19  | 07.19  | 08.19     |        |        |
|------------------------------------------|---------------|----------|--------|--------|--------|--------|--------|--------|--------|--------|--------|--------|--------|-----------|--------|--------|
| Sample number                            | 2.1           | 2.2      | 2.3    | 2.4    | 2.5    | 2.6    | 2.7    | 2.8    | 2.9    | 2.10   | 2.11   | 2.12   | 2.13   | 2.14      |        |        |
| PAH species                              | Material size | < 0.4 mm |        |        |        |        |        |        |        |        |        |        |        | 0.5–2.5mm |        |        |
| Naphthalene                              | 8.430         | 5.756    | 6.910  | 7.272  | 6.847  | 6.624  | 6.569  | 7.151  | 7.723  | 8.784  | 8.492  | 8.639  | 8.098  | 7.159     | 6.270  | 6.790  |
| Acenaphthylene                           | 5.950         | 4.454    | 5.523  | 5.584  | 5.103  | 4.579  | 4.873  | 5.266  | 5.619  | 6.096  | 5.872  | 5.803  | 4.830  | 5.055     | 4.204  | 4.801  |
| Acenaphthene                             | 0.168         | 0.146    | 0.211  | 0.140  | 0.196  | 0.143  | 0.147  | 0.265  | 0.246  | 0.356  | 0.264  | 0.229  | 0.183  | 0.106     | 0.109  | 0.099  |
| Fluorene                                 | 0.327         | 0.278    | 0.342  | 0.290  | 0.318  | 0.289  | 0.259  | 0.587  | 0.557  | 0.628  | 0.473  | 0.453  | 0.388  | 0.252     | 0.238  | 0.257  |
| Phenanthrene                             | 8.460         | 7.389    | 8.368  | 7.349  | 7.820  | 7.337  | 6.954  | 8.675  | 8.015  | 9.004  | 8.520  | 8.634  | 8.692  | 7.396     | 6.644  | 6.832  |
| Anthracene                               | 0.642         | 0.506    | 0.610  | 0.486  | 0.567  | 0.540  | 0.482  | 0.606  | 0.578  | 0.653  | 0.617  | 0.645  | 0.669  | 0.444     | 0.387  | 0.391  |
| Fluoranthene                             | 15.981        | 13.053   | 14.157 | 13.494 | 12.575 | 13.093 | 12.258 | 15.164 | 15.000 | 15.919 | 15.283 | 15.633 | 15.980 | 11.717    | 10.786 | 11.643 |
| Pyrene                                   | 47.817        | 37.907   | 40.491 | 39.482 | 37.418 | 37.928 | 35.906 | 44.787 | 45.063 | 47.044 | 45.275 | 46.635 | 47.042 | 32.740    | 31.227 | 32.735 |
| Benzo[b]naphtho[2,1- <i>d</i> ]thiophene | 0.221         | 0.140    | 0.167  | 0.128  | 0.193  | 0.154  | 0.145  | 0.191  | 0.160  | 0.173  | 0.238  | 0.189  | 0.222  | 0.279     | 0.231  | 0.210  |
| Benzo[ <i>ghi</i> ]fluoranthene          | 5.207         | 4.220    | 4.215  | 4.206  | 4.137  | 4.348  | 4.042  | 4.568  | 4.722  | 4.928  | 4.657  | 4.875  | 5.172  | 3.459     | 3.399  | 3.487  |
| Benzo[ <i>c</i> ]phenanthrene            | 0.249         | 0.191    | 0.221  | 0.178  | 0.212  | 0.197  | 0.175  | 0.267  | 0.232  | 0.244  | 0.238  | 0.247  | 0.248  | 0.196     | 0.188  | 0.193  |
| Benzo[ <i>a</i> ]anthracene              | 0.374         | 0.312    | 0.459  | 0.256  | 0.400  | 0.287  | 0.285  | 0.399  | 0.304  | 0.327  | 0.361  | 0.357  | 0.356  | 0.290     | 0.212  | 0.223  |
| Cyclopenta[ <i>cd</i> ]pyrene            | 12.597        | 7.367    | 8.700  | 9.717  | 8.612  | 8.519  | 8.373  | 10.391 | 11.682 | 12.169 | 11.846 | 11.975 | 11.107 | 7.938     | 6.023  | 7.176  |
| Triphenylene                             | 0.276         | 0.271    | 0.373  | 0.206  | 0.353  | 0.241  | 0.262  | 0.299  | 0.219  | 0.240  | 0.306  | 0.235  | 0.234  | 0.333     | 0.284  | 0.274  |
| Chrysene                                 | 0.535         | 0.477    | 0.710  | 0.421  | 0.600  | 0.446  | 0.462  | 0.600  | 0.439  | 0.456  | 0.537  | 0.484  | 0.452  | 0.661     | 0.508  | 0.465  |
| Benzo[ <i>b</i> ]fluoranthene            | 0.973         | 0.754    | 0.809  | 0.689  | 0.772  | 0.797  | 0.673  | 0.843  | 0.816  | 0.888  | 0.912  | 0.909  | 1.079  | 0.716     | 0.589  | 0.585  |
| Benzo[ <i>k</i> ]fluoranthene            | 0.283         | 0.191    | 0.215  | 0.177  | 0.214  | 0.209  | 0.167  | 0.241  | 0.240  | 0.247  | 0.284  | 0.289  | 0.320  | 0.190     | 0.162  | 0.138  |
| Benzo[ <i>j</i> ]fluoranthene            | 0.300         | 0.210    | 0.207  | 0.195  | 0.246  | 0.215  | 0.221  | 0.280  | 0.243  | 0.293  | 0.314  | 0.323  | 0.386  | 0.202     | 0.186  | 0.165  |
| Benzo[ <i>e</i> ]pyrene                  | 2.841         | 2.494    | 2.489  | 2.311  | 2.693  | 2.732  | 2.295  | 2.852  | 2.807  | 3.095  | 3.006  | 3.065  | 3.589  | 2.350     | 2.086  | 2.007  |
| Benzo[ <i>a</i> ]pyrene                  | 2.866         | 2.341    | 2.466  | 2.317  | 2.355  | 2.488  | 2.106  | 2.772  | 2.771  | 3.131  | 2.954  | 2.934  | 3.375  | 2.098     | 1.664  | 1.776  |
| Perylene                                 | 0.434         | 0.302    | 0.289  | 0.271  | 0.378  | 0.393  | 0.296  | 0.322  | 0.324  | 0.415  | 0.458  | 0.472  | 0.571  | 0.274     | 0.251  | 0.222  |
| Indeno[1,2,3- <i>cd</i> ]pyrene          | 3.429         | 2.806    | 2.691  | 2.738  | 3.090  | 3.319  | 2.657  | 2.892  | 3.054  | 3.277  | 3.326  | 3.462  | 4.216  | 1.851     | 1.571  | 1.529  |
| Dibenzo[ <i>a,h</i> ]anthracene          | 0.025         | 0.024    | 0.033  | 0.014  | 0.035  | 0.022  | 0.018  | 0.018  | 0.013  | 0.013  | 0.018  | 0.023  | 0.015  | <0,001    | <0,001 | <0,001 |
| Benzo[ <i>ghi</i> ]perylene              | 15.512        | 13.839   | 13.191 | 13.166 | 12.884 | 13.939 | 11.975 | 16.491 | 16.863 | 17.420 | 15.666 | 16.314 | 19.272 | 11.610    | 9.942  | 10.449 |
| Anthanthrene                             | 5.577         | 3.231    | 3.056  | 3.564  | 4.058  | 4.406  | 3.657  | 4.311  | 4.625  | 5.377  | 5.410  | 5.605  | 6.262  | 1.992     | 1.574  | 1.601  |
| Coronene                                 | 13.269        | 12.806   | 11.396 | 10.559 | 10.211 | 12.393 | 10.483 | 12.708 | 12.685 | 13.559 | 11.353 | 12.343 | 14.268 | 8.742     | 7.866  | 7.835  |
